# Supplementary material for: Prevalence of reproductive tract infections and the predictive value of girls’ symptom-based reporting: findings from a cross-sectional survey in rural western Kenya
Source: PubMed Central journal article supplement (PMC4893088; doi:10.1136/sextrans-2015-052371), 2016-01-27
Supplement: sextrans-2015-052371-s1.pdf [file sextrans-2015-052371-s1.pdf]

# MS-STUDY RTI SCREENING FORM

File number

    
 Gem
Girl's study ID   -  -  Nurse ID  Visit date   /   /   

## SECTION 1: CLINICAL CHECK-(SCREENING FOR ILLNESS)

1. **Be isebedo kiwinjo maber/kingima e dwe mokalo ni?**

(Have you been feeling well this last month?) feel\_well

 Ee (Yes)  Ooyo (No)

2. **Ka ooyo, nitimang'o?** (If no, what did you do) feel\_other

Dhi ei osipital (Go to hospital)  Dhi ei od thieth (Go to health facility)  bara skul (Miss school)  Mamoko (Other)

3. If any health problems that are not menstrual/RTI/TSS, write in this box what the problem was, how you advised care and what services are signposted: health\_problems

-----  
-----

4. **Be isebedo kichuero remo mang'eny e kinde manidhiye e dwe mogik?** (Have you been bleeding very heavily during your recent monthly period?)

bleed\_heavily  
 Ee (Yes)  Ooyo (No)

5. **Be isebetie kineno remo bang dwe mogik kapok ichako dwe manyien?** (Have you had any bleeding in between one period and the next period?)

bleed\_btwn  
 Ee (Yes)  Ooyo (No)

6. **Saa asaya e dwe mokalo-Bende iwinjo rem kata lit sama iolo pii/layo?** (Do you have pain or burning during urination?)

burn\_urine  
 Ee (Yes)  Ooyo (No)

7. **Saa asaya e dwe mokalo-Bende isebedo kilayo sate sate/saa ka saa (layo mohingo kaka pile)?** (Do you have more frequent urination (pass urine more than usual)?)

freq\_urine  
 Ee (Yes)  Ooyo (No)

8. **Saa asaya e dwe mokalo-Be iwinjoga rem e piny iyi, kata e duong'ni?** (Do you have any pain in your abdomen, or vagina?)

abdomen\_pain  
 Ee (Yes)  Ooyo (No)

9. **Saa asaya e dwe mokalo-Be duong'ni ili?**

(Any time last month-Are you at all itchy, sore in your vagina?)

itchy\_private  
 Ee (Yes)  Ooyo (No)

10. **Saa asaya e dwe mokalo-Be nitie tik moro amora mawuok e duong'ni?** (Is there any smell coming from your vagina?) (If No go to Q12)

smell\_coming  
 Ee (Yes)  Ooyo (No)

11. **ka kamano ,ler ni en tik machal nadi?** (If yes, describe type of smell)

smell\_other  
 Dirty  Fishy  Blood  Other

12. **Saa asaya e dwe-Be nitiega gik mawuok/machuer kowuok e duong'ni?** (Is there any discharge coming from your vagina?) (If No go to Q15)

disch\_coming  
 Ee (Yes)  Ooyo (No)

13. **ka kamano ,en?** (If yes, is it:)

Machal go othinyo (Mucusy)  Motimo byoyo (Frothy) is\_it  Mong'inore (curd-like)  NA  Other

14. **ka kamano ,no chal nadi?** (If yes, what color:)

Rachar (White)  Majan (Green)  Raton'g (Yellow) what\_color  Motimo remo (Bloody)  NA

15. **Bende ne iriwrie gi ng'ama dichuo e dwe mokalo?** (Did you have sex in the past month?) (If No go to Q18)

have\_sex  
 Ee (Yes)  Ooyo (No)

16. **Ka kamano, be nenitiere chuer, rem kata chandruok moro amora kaluwore gi riwruok?** If yes, was there any bleeding, pain or other problem with sex?

pain\_sex  
 Ee (Yes)  Ooyo (No)  
 NA

17. **Ka kamano, ne en ang'o?** (If yes, What?)  Ee, rem (Yes), pain  Ee, chuer (Yes, bleed)  Mamoko, (Other)  NA

yes\_what

## ACTIONS

18. **SWAB TAKEN:** swab\_taken  Yes  No

Time collected (24HR)

TIME:   -

time\_swab

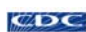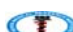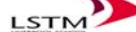

Verified
