# Supplementary material for: Prevalence of reproductive tract infections and the predictive value of girls’ symptom-based reporting: findings from a cross-sectional survey in rural western Kenya
Source: PubMed Central journal article supplement (PMC4893088; doi:10.1136/sextrans-2015-052371), 2016-01-27
Supplement: sextrans-2015-052371-s2.pdf [file sextrans-2015-052371-s2.pdf]

Table S1 Number and percentage of overlapping symptoms reported by girls

|                                       | Heavy menstruation | Between menses bleeding | Burning urine | Frequency urine | Abdominal/vaginal pain | Pain/bleed during intercourse | Itchy/sore vagina | Malodorous smell | Vaginal discharge |
|---------------------------------------|--------------------|-------------------------|---------------|-----------------|------------------------|-------------------------------|-------------------|------------------|-------------------|
| Heavy menstruation (33) and           | 33 (100)           | 8 (24.2)                | 3 (9.1)       | 4 (12.1)        | 11 (33.3)              | 1 (3.0)                       | 6 (18.2)          | 3 (9.1)          | 8 (24.2)          |
| Between menses bleeding (20) and      | 8 (40.0)           | 20 (100)                | 2 (10.0)      | 3 (15.0)        | 5 (25.0)               | 0                             | 2 (10.0)          | 1 (5.0)          | 6 (30.0)          |
| Burning urine (11) and                | 3 (27.3)           | 2 (18.2)                | 11 (100)      | 3 (27.3)        | 7 (63.6)               | 1 (9.1)                       | 6 (54.5)          | 2 (18.2)         | 1 (9.1)           |
| Frequency of urine (13) and           | 4 (30.8)           | 3 (23.1)                | 3 (23.1)      | 13 (100)        | 3 (23.1)               | 0                             | 5 (38.5)          | 4 (30.8)         | 2 (15.4)          |
| Abdominal / vaginal pain (45) and     | 11 (24.4)          | 5 (11.1)                | 7 (15.6)      | 3 (6.7)         | 45 (100)               | 1 (2.2)                       | 9 (20.0)          | 3 (6.7)          | 12 (26.7)         |
| Pain/bleed during intercourse (2) and | 1 (50.0)           | 0                       | 0             | 0               | 1 (50.0)               | 2 (100)                       | 1 (50.0)          | 1 (50.0)         | 1 (50.0)          |
| Itchy/sore vagina (22) and            | 6 (27.3)           | 2 (9.1)                 | 6 (27.3)      | 5 (22.7)        | 9 (40.9)               | 1 (4.5)                       | 22 (100)          | 7 (31.8)         | 9 (40.9)          |
| Malodorous smell (9) and              | 3 (33.3)           | 1 (11.1)                | 2 (22.2)      | 4 (44.4)        | 3 (33.3)               | 1 (11.1)                      | 7 (77.7)          | 9 (100)          | 6 (66.6)          |
| Vaginal discharge (53) and            | 8 (15.1)           | 6 (11.3)                | 1 (1.9)       | 2 (3.8)         | 12 (22.6)              | 1 (1.9)                       | 9 (17.0)          | 6 (11.3)         | 53 (100)          |
