# Supplementary material for: Prevalence of reproductive tract infections and the predictive value of girls’ symptom-based reporting: findings from a cross-sectional survey in rural western Kenya
Source: PubMed Central journal article supplement (PMC4893088; doi:10.1136/sextrans-2015-052371), 2016-01-27
Supplement: sextrans-2015-052371-s3.pdf [file sextrans-2015-052371-s3.pdf]

### S3 Additional Web References

- w1 Sewankambo N, Gray RH, Wawer MJ, et al. HIV-1 infection associated with abnormal vaginal flora morphology and bacterial vaginosis. *Lancet* 1997;**350**(9077):546-50.
- w2 Atashili J, Poole C, Ndumbe PM, et al. Bacterial vaginosis and HIV acquisition: a meta-analysis of published studies. *AIDS* 2008;**22**(12):1493-501.
- w3 Madhivanan P, Krupp K, Chandrasekaran V, et al. Prevalence and correlates of bacterial vaginosis among young women of reproductive age in Mysore, India. *Indian journal of medical microbiology* 2008;**26**(2):132-7.
- w4 WHO. The sexual and reproductive health of younger adolescents: research issues in developing countries. Geneva, Switzerland: World Health Organization, 2011.
- w5 KAIS. Kenya AIDS Indicator Survey 2012. Preliminary Report ed. Nairobi, Kenya: National AIDS and STI Control Programme, Ministry of Health, 2013.
- w6 WHO. Sexually transmitted infections and other reproductive tract infections- a guide to essential practice. Geneva, Switzerland World Health Organisation, 2005.
- w7 Otieno FO, Ndivo R, Oswago S, et al. Correlates of prevalent sexually transmitted infections among participants screened for an HIV incidence cohort study in Kisumu, Kenya. *Int J STD AIDS* 2015;**26**(4):225-37.
- w8 Garg R, Goyal S, Gupta S. India moves towards menstrual hygiene: subsidized sanitary napkins for rural adolescent girls - issues and challenges. *Maternal and Child Health Journal* 2012;**16**:767-74.
- w9 Odhiambo FO, Laserson KF, Sewe M, et al. Profile: The KEMRI/CDC Health and Demographic Surveillance System--Western Kenya. *Int J Epidemiol* 2012;**41**(4):977-87.
- w10 CDC. Diseases and related conditions: Sexually transmitted diseases US Centers for Disease Control and Prevention 2012 <http://www.cdc.gov/std/general/default.htm> (last accessed 28 November 2015).

- w11 Rogstad K. *ABC of Sexually Transmitted Infections*. 6th ed: BMJ Books, 2011.
- w12 Strauss RA, Eucker B, Savitz DA, et al. Diagnosis of bacterial vaginosis from self-obtained vaginal swabs. *Infect Dis Obstet Gynecol* 2005;**13**(1):31-5.
- w13 Plummer ML, Ross DA, Wight D, et al. "A bit more truthful": the validity of adolescent sexual behaviour data collected in rural northern Tanzania using five methods. *Sex Transm Infect* 2004;**80 Suppl 2**:ii49-56.
- w13 Kyongo JK, Crucitti T, Menten J, et al. Cross-Sectional Analysis of Selected Genital Tract Immunological Markers and Molecular Vaginal Microbiota in Sub-Saharan African Women, with Relevance to HIV Risk and Prevention. *Clin Vaccine Immunol* 2015;**22**(5):526-38.
- w14 Buve A, Jespers V, Crucitti T, et al. The vaginal microbiota and susceptibility to HIV. *AIDS* 2014;**28**(16):2333-44.
